# Supplementary material for: Predicting the release profile of small molecules from within the ordered nanostructured lipidic bicontinuous cubic phase using translational diffusion coefficients determined by PFG-NMR
Source: Royal Society of Chemistry journal article supplement (doi:10.1039/c6nr07382d), 2017-01-01
Supplement: c6nr07382d1.pdf [file c6nr07382d1.pdf]

# **Predicting the release profile of small molecules from within the ordered nanostructured lipidic bicontinuous cubic phase using translational diffusion coefficients determined by PFG-NMR**

## **Supporting Information**

Thomas G. Meikle<sup>a,b</sup>, Shenggen Yao<sup>b</sup>, Alexandru Zabara<sup>c</sup>, Charlotte E. Conn<sup>c</sup>, Calum J. Drummond<sup>c</sup>, Frances Separovic<sup>a,b</sup>

<sup>a</sup> School of Chemistry, University of Melbourne, VIC 3010, Australia

<sup>b</sup> Bio21 Institute, University of Melbourne, VIC 3010, Australia

<sup>c</sup> School of Science, College of Science, Engineering and Health, RMIT University,

124 La Trobe Street, Melbourne VIC 3000, Australia. Email: calum.drummond@rmit.edu.au

**Table S1.** SAXS determined structural parameters of monoolein and phytantriol based cubic mesophases encapsulating increasing amounts of 200 mM L-histidine or 200 mM L-phenylalanine.

| <b>Sample</b>          | <b>Phase</b> | <b>LP (Å)</b> |
|------------------------|--------------|---------------|
| MO 35% L-histidine     | Ia3d         | 149.7         |
| MO 40% L-histidine     | Pn3m         | 101.0         |
| MO 42% L-histidine     | Pn3m         | 103.3         |
| MO 44% L-histidine     | Pn3m         | 103.4         |
| MO 46% L-histidine     | Pn3m         | 105.5         |
| MO 44% L-phenylalanine | Ia3d         | 175.0         |
| MO 44% L-phenylalanine | Pn3m         | 106.2         |
| MO 46% L-phenylalanine | Pn3m         | 110.2         |
| MO 48% L-phenylalanine | Pn3m         | 118.8         |
| MO 50% L-phenylalanine | Pn3m         | 125.6         |
| MO 52% L-phenylalanine | Pn3m         | 125.9         |
| PT 26% L-histidine     | Ia3d         | 100.1         |
| PT 28% L-histidine     | Pn3m         | 65.6          |
| PT 30% L-histidine     | Pn3m         | 68.2          |
| PT 32% L-histidine     | Pn3m         | 68.7          |
| PT 26% L-phenylalanine | Pn3m         | 66.7          |
| PT 28% L-phenylalanine | Pn3m         | 66.7          |
| PT 30% L-phenylalanine | Pn3m         | 68.7          |
| PT 32% L-phenylalanine | Pn3m         | 68.9          |

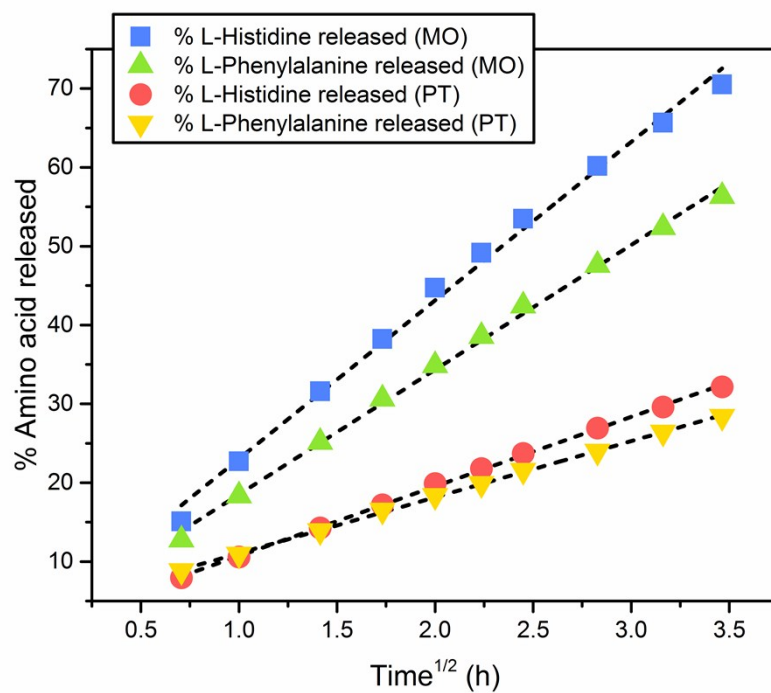

**Figure S1.** Plot of % amino acid released versus square root of time (hours), for each of the four systems measured directly in the *in vitro* release study.
